# Supplementary material for: Metal–organic framework-interfaced ELISA probe enables ultrasensitive detection of extracellular vesicle biomarkers
Source: Royal Society of Chemistry journal article supplement (doi:10.1039/d4tb00585f), 2024-01-01
Supplement: d4tb00585f1.pdf [file d4tb00585f1.pdf]

## Supplementary Information

### **Metal-Organic Framework-Interfaced ELISA Probe Affords Ultrasensitive Detection of Extracellular Vesicle Biomarkers**

Jingzhu Shi<sup>a,‡</sup>, Sharat Chandra Barman<sup>a,d,‡</sup>, Shibo Cheng<sup>a</sup>, Yong Zeng<sup>\*a,b,c</sup>

<sup>a</sup> Department of Chemistry, University of Florida, Gainesville, FL, 32611, USA

<sup>b</sup>J. Crayton Pruitt Family Department of Biomedical Engineering, University of Florida, Gainesville, FL, 32611, USA

<sup>c</sup>University of Florida Health Cancer Center, Gainesville, FL, 32611, USA

<sup>d</sup>Currently working at King Abdullah University of Science and Technology, Thuwal, 23955, Saudi Arabia

\* Corresponding author: zengy@ufl.edu (Y. Zeng)

### **Table of Content**

|           |                                                                      |        |
|-----------|----------------------------------------------------------------------|--------|
| Figure S1 | NTA data of MAF-7 and HRP@MAF-7                                      | Pg. S2 |
| Figure S2 | EDX mapping of elemental distributions for MAF-7                     | Pg. S2 |
| Figure S3 | 77 K N <sub>2</sub> adsorption isotherms for MAF-7.                  | Pg. S3 |
| Figure S4 | Enzymatic activity of free-HRP and HRP@MAF-7 after thermal treatment | Pg. S4 |
| Table S1  | Detection of CD147 spiked in human plasma samples by MELISA          | Pg. S5 |
| Table S2  | Plasma samples used in this research                                 | Pg. S5 |

## Methods

Nanoparticles Tracking Analysis (NTA). NTA data was obtained using Particle Metrix particle tracking analyzer from ZetaView equipped with a sample chamber with a 640-nm laser and a Viton fluor elastomer O-ring. The samples were diluted 1000 times and injected in the sample chamber with sterile syringes (BD Discardit II) until the liquid reached the tip of the nozzle. All measurements were performed at room temperature.

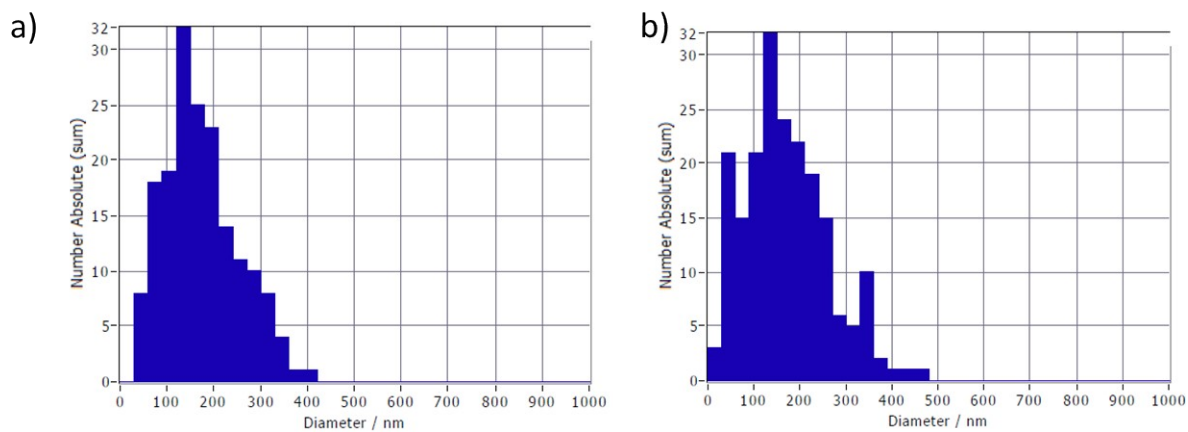

Figure S1. NTA data of MAF-7 (left) and HRP@MAF-7 (right)

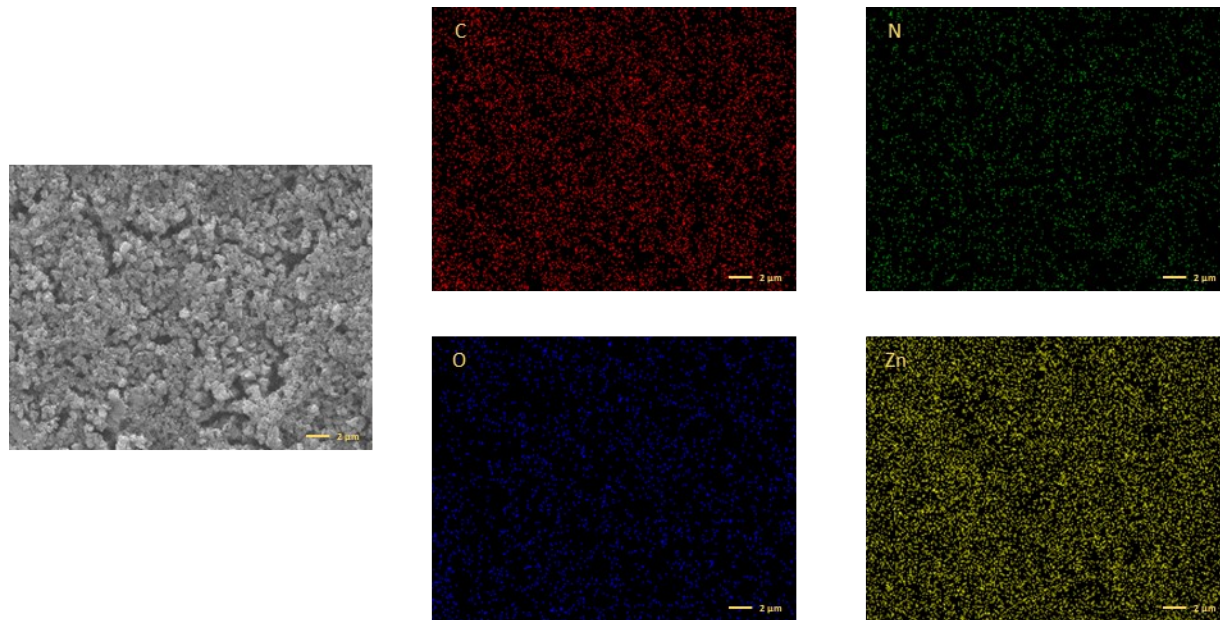

Figure S2. SEM (left) of MAF-7 and corresponding EDX mapping of elemental distributions for Carbon, Nitrogen, Oxygen, and Zinc (right).

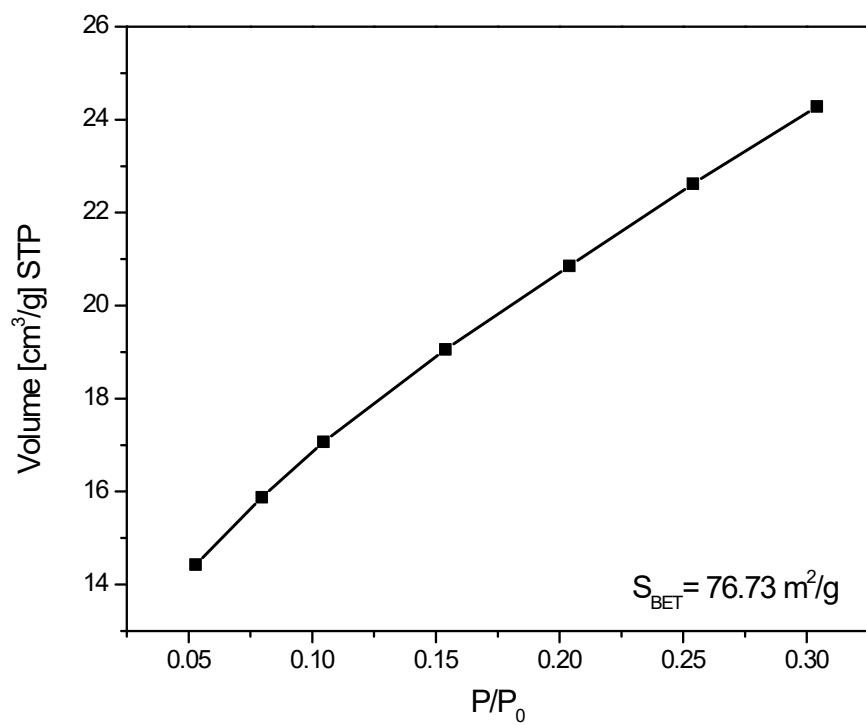

**Figure S3.** 77 K N<sub>2</sub> adsorption isotherms for MAF-7. The calculated BET surface area was listed in the inset.

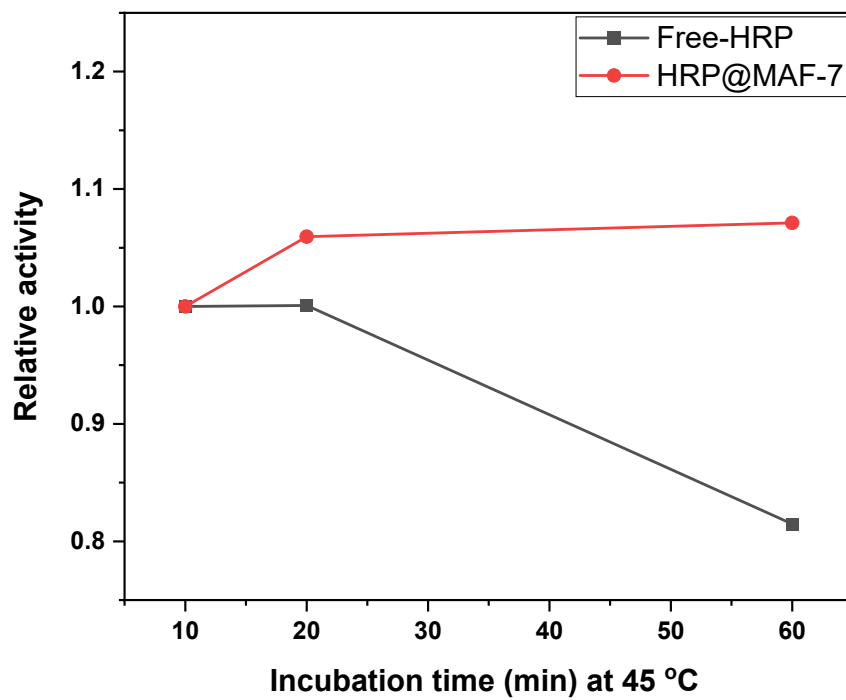

**Figure S4.** The enzymatic activity of free-HRP and HRP@MAF-7 after subjecting them to thermal treatment at 45 °C for varying durations.

**Table S1: Detection of CD147 spiked in human plasma samples by MELISA**

| Sample | Added (pg/mL) | Found (pg/mL) | Recovery (%) | RSD (%) |
|--------|---------------|---------------|--------------|---------|
| 1      | 1             | 1.10          | 110          | 4.6     |
| 2      | 10            | 9.08          | 90.8         | 7.9     |
| 3      | 100           | 110.1         | 110.1        | 1.6     |

**Table S2: Plasma samples used in Figure 6.**

| <b>Breast Cancer Patients</b> | <b>Age</b> | <b>Pathology Status</b> | <b>Histologic Type</b> | <b>Specimen Type</b> |
|-------------------------------|------------|-------------------------|------------------------|----------------------|
| 1                             | 61         | Primary Cancer          | Ductal carcinoma       | Plasma               |
| 2                             | 57         | Primary Cancer          | Carcinoma, NOS         | Plasma               |
| 3                             | 30         | Primary Cancer          | Carcinoma, NOS         | Plasma               |
| 4                             | 36         | Primary Cancer          | Ductal carcinoma       | Plasma               |
| 5                             | 69         | Primary Cancer          | Ductal carcinoma       | Plasma               |
| <b>Non-cancer control</b>     | <b>Age</b> | <b>Pathology Status</b> | <b>Histologic Type</b> | <b>Specimen Type</b> |
| 6                             | /          | Healthy Control         | No history of cancer   | Plasma               |
| 7                             | /          | Healthy Control         | No history of cancer   | Plasma               |
| 8                             | /          | Healthy Control         | No history of cancer   | Plasma               |
| 9                             | /          | Healthy Control         | No history of cancer   | Plasma               |
| 10                            | /          | Healthy Control         | No history of cancer   | Plasma               |
